1 **Repeat expansion and methylation state analysis with nanopore**  
2 **sequencing**

3 Pay Gießelmann<sup>§1</sup>, Björn Brändl<sup>§1,2</sup>, Etienne Raimondeau<sup>3</sup>, Rebecca Bowen<sup>3</sup>,  
4 Christian Rohrandt<sup>4</sup>, Rashmi Tandon<sup>2</sup>, Helene Kretzmer<sup>1</sup>, Günter Assum<sup>5</sup>, Christina  
5 Galonska<sup>1</sup>, Reiner Siebert<sup>5</sup>, Ole Ammerpohl<sup>5</sup>, Andrew Heron<sup>3</sup>, Susanne A.  
6 Schneider<sup>6</sup>, Julia Ladewig<sup>7,8,9,10</sup>, Philipp Koch<sup>7,8,9</sup>, Bernhard M. Schuldt<sup>2</sup>, James E.  
7 Graham<sup>3</sup>, Alexander Meissner<sup>1,11</sup> and Franz-Josef Müller<sup>\*1,2</sup>

8 **1** Department of Genome Regulation, Max Planck Institute for Molecular Genetics, (Berlin, Germany) **2**  
9 Universitätsklinikum Schleswig-Holstein Campus Kiel, Zentrum für Integrative Psychiatrie gGmbH (Kiel,  
10 Germany) **3** Oxford Nanopore Technologies (Oxford, UK) **4** Kiel University of Applied Sciences, Institute for  
11 Communications Technology and Microelectronics (Kiel, Germany) **5** Institute for Human Genetics, Ulm  
12 University and Ulm University Medical Center (Ulm, Germany) **6** Department of Neurology, Ludwig-Maximilians-  
13 Universität (München, Germany) **7** Central Institute of Mental Health, Medical Faculty Mannheim, Heidelberg  
14 University (Mannheim, Germany) **8** HITBR Hector Institute for Translational Brain Research gGmbH (Heidelberg,  
15 Germany) **9** German Cancer Research Center (DKFZ) (Heidelberg, Germany) **10** Institute of Reconstructive  
16 Neurobiology, University of Bonn Medical Center (Bonn, Germany) **11** Department of Stem Cell and  
17 Regenerative Biology, Harvard University (Cambridge, USA)

18 <sup>§</sup> Pay Gießelmann and Björn Brändl contributed equally to this work.

19 \* corresponding author

20 **Expansions of short tandem repeats are genetic variants that have been**  
21 **implicated in neuropsychiatric and other disorders but their assessment**  
22 **remains challenging with current molecular methods. Here, we developed a**  
23 **Cas12a-based enrichment strategy for nanopore sequencing that, combined**  
24 **with a new algorithm for raw signal analysis, enables us to efficiently target,**  
25 **sequence and precisely quantify repeat numbers as well as their DNA**  
26 **methylation status. Taking advantage of these single molecule nanopore**  
27 **signals provides therefore unprecedented opportunities to study pathological**  
28 **repeat expansions.**

29 The expansion of unstable genomic Short Tandem Repeats (STRs) causes more  
30 than 30 Mendelian human disorders<sup>1</sup>. For example, expansion of a GGGGCC-repeat  
31 [(G<sub>4</sub>C<sub>2</sub>)<sub>n</sub>] within the C9orf72 gene is the most frequent monogenic cause of  
32 Frontotemporal Dementia (FTD) and Amyotrophic Lateral Sclerosis (ALS;  
33 c9FTD/ALS; OMIM: # 105550)<sup>2,3</sup>. Similarly, accumulation of a CGG motif in the  
34 FMR1 gene underlies the Fragile X Syndrome (FXS; OMIM # 300624), currently the  
35 most common identifiable genetic cause of mental retardation and autism<sup>4</sup>. In both  
36 prototypical repeat expansion disorders (Suppl. Discussion 1), recent evidence has  
37 suggested pronounced inter- and intraindividual repeat variability as well as changes  
38 in DNA methylation of the respective genomic regions to modulate disease  
39 phenotype<sup>5-8</sup>.

40 To overcome current difficulties in characterizing expanded STRs (Suppl. Discussion  
41 2) most notably we focused on three areas: i) optimization of Nanopore sequencing  
42 and signal processing to capture STRs ii) development and implementation of a

43 target enrichment strategy to increase efficiency and iii) integration of expansion  
 44 measurements with DNA methylation of the same molecule.

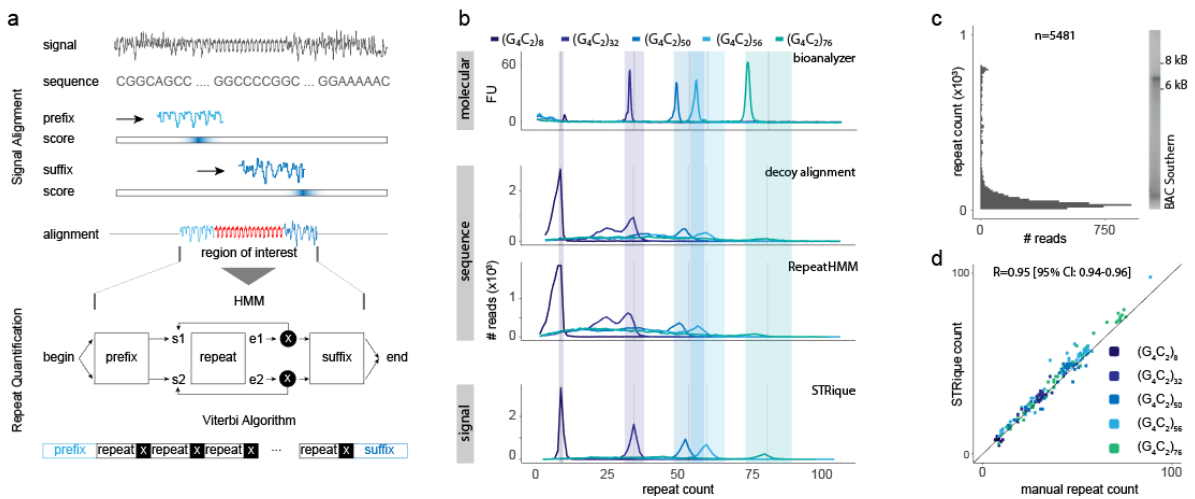

45

46 **Figure1** nanoSTRique: Generic repeat detection pipeline on raw nanopore signals.

47 **a)** Repeat quantification by signal-alignment of flanking prefix and suffix regions and HMM based  
 48 count on signal of interest. **b)** BioAnalyzer electropherogram, decoy alignment, RepeatHMM and  
 49 nanoSTRique counts of synthetic  $(G_4C_2)_n$  repeats (10k random reads per barcode, +/- 10% intervals  
 50 around expected repeat length). **c)** Nanopore sequencing and analysis of BAC clone 239 from a  
 51 c9ALS/FTD patient compared to cropped corresponding lane from Ref. 15 for illustration purpose. **d)**  
 52 manual confirmation of detected repeat counts in synthetic repeats (n=16, 50, 49, 49, 47).

53 First, for benchmarking repeat expansion counting methods we constructed, verified  
 54 and nanopore sequenced plasmids with several synthetic  $(G_4C_2)_n$ -repeat lengths<sup>9</sup>.  
 55 We analyzed our results with currently available STR quantification pipelines<sup>10,11</sup> but  
 56 found those methods to become unreliable for more than 32  $(G_4C_2)_n$ -repeats with  
 57 nanopore reads. To further improve the repeat analysis we developed a signal  
 58 processing algorithm for a more exact quantification of STR numbers in raw  
 59 nanopore signals (nanoSTRique: **n**anopore **S**hort **T**andem **R**epeat **i**dentification,  
 60 **q**uantification & **e**valuation, Fig. 1a, Suppl. Fig. 1). Briefly (see Online Methods for  
 61 details), reads spanning a STR location are identified by aligning the conventionally  
 62 base-called sequences to a reference<sup>12</sup>. Next, nanoSTRique maps the upstream and  
 63 downstream boundaries of each repeat more precisely with a signal alignment

64 algorithm using SeqAn2<sup>13</sup> and, as a third step, accurately quantifies the number of  
65 any given STR sequence with a Hidden Markov Model (Suppl. Fig. 1)<sup>14</sup>. Aggregated  
66 nanoSTRique repeat counts matched closely gel electrophoresis profiles from our  
67 synthetic repeats and could be confirmed on the single molecule level by manually  
68 counting repeat patterns in raw signal traces (Fig. 1d) (Suppl. Fig. 2, 3). Previously,  
69 repeat instability had been noted in Bacterial Artificial Chromosomes (BAC)  
70 containing expanded C9orf72 (G<sub>4</sub>C<sub>2</sub>)<sub>n</sub>-repeats (Online Methods)<sup>15</sup>. Analysing BAC  
71 clone 239 from a c9FTD/ALS patient (G<sub>4</sub>C<sub>2</sub>)<sub>~800</sub><sup>15</sup> with nanoSTRique we observed  
72 STR contractions in many reads and a secondary peak at 800 repeats (Fig 1c,  
73 Online Methods), while existing methods failed to mirror previously published  
74 Southern blot results (Suppl. Fig. 3).

75 Next we performed whole genome nanopore sequencing from c9FTD/ALS patient-  
76 derived DNA using four MinION flow cells yielding a total of 39 GBp (8M reads, 11  
77 on target, none expanded). Our and similar nanopore whole genome sequencing  
78 results from others<sup>16</sup> suggested a relevant bias against the detection of (G<sub>4</sub>C<sub>2</sub>)<sub>n</sub>-  
79 expansions with conventional molecular and bioinformatic nanopore workflows. To  
80 improve the coverage of any STR particularly the (G<sub>4</sub>C<sub>2</sub>)<sub>n</sub>-region in our proof of  
81 concept, we took advantage of the programmable CRISPR-Cas12a-  
82 ribonucleoprotein (Cas12a-RNP), which cleaves DNA via staggered double-strand  
83 breaks<sup>17</sup>. The Cas-system was applied to selectively target DNA sequences from a  
84 patient-derived induced pluripotent stem cell line (24/5#2) adjacent to the (G<sub>4</sub>C<sub>2</sub>)<sub>n</sub>-  
85 repeat resulting in unique 4 bp overhangs amenable to ligation of a linker oligo and  
86 subsequent attachment of the nanopore sequencing adapter (Fig. 2a, Online  
87 Methods). To further improve enrichment results we replaced the oligo adapter  
88 ligation step by adding Klenow fragment to fill in the Cas12a overhangs. The

89 resulting dA-tailed DNA ends enabled even more efficient ligation of the sequencing  
 90 adapters.

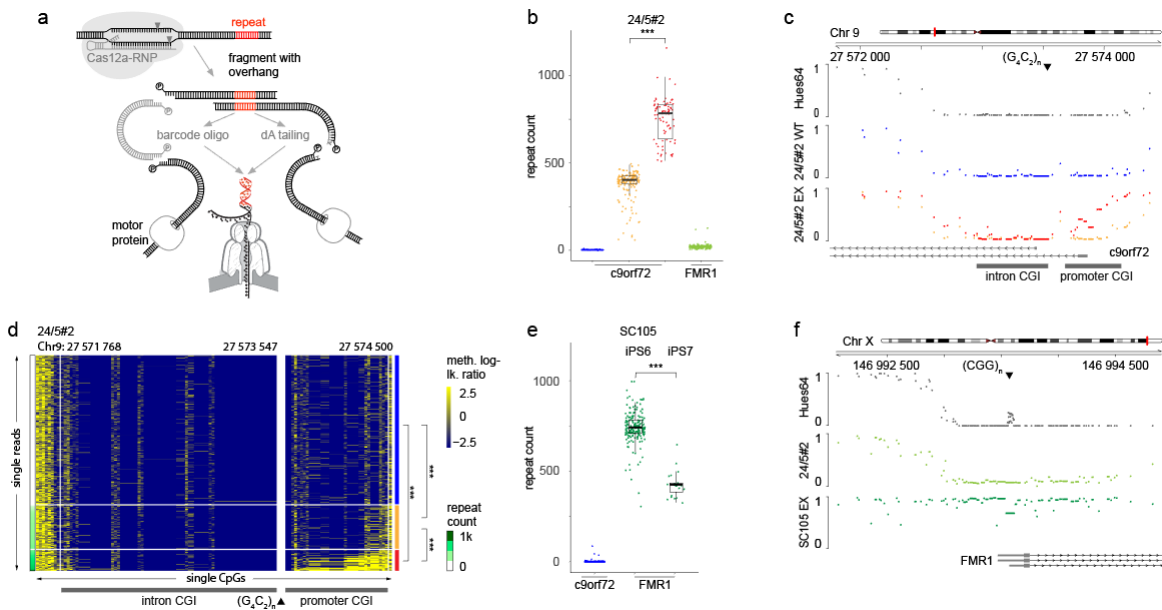

91

92 **Figure 2** Targeted enrichment and nanopore sequencing with CRISPR-Cas12a.

93 **a)** Illustration of the CRISPR-Cas12a target enrichment procedure **b)** Repeat quantification of sample  
 94 24/5#2 on c9orf72 and FMR1 loci revealing two distinct repeat bands of ~450 and ~750  $(G_4C_2)_n$ -  
 95 repeats. (n=442,165,78,499; difference in repeat length 385 [95% CI: 361:404]) **c)** c9orf72  
 96 methylation status in Hues64 (WGBS), wild type allele and expanded allele of patient 24/5#2  
 97 (nanopore). **d)** Single read nanopore methylation of c9orf72 covering reads (n=769, row split 30,500)  
 98 sorted by detected repeat length. (row:single read, column: single CpG, log-p > 2.5: methylated, log-p  
 99 < -2.5: unmethylated, two sided wilcoxon rank sum test on mean promoter CGI methylation, median  
 100 methylation difference [95% CI] wt-450: 6.9e-6 [3.5e-5 - 3.3e-2], wt-750: 0.33 [0.24 - 0.42], 450-750:  
 101 0.30 [0.20 - 0.42]) **e)** Repeat quantification of SC105iPS6/iPS7 sample on c9orf72 and FMR1 loci.  
 102 (n=850,183,23; difference in repeat length -322 [95% CI: -351:-298]) **f)** FMR1 methylation status in  
 103 Hues64 (WGBS), wild type allele of patient 24/5#2 and expanded alleles of samples SC105iPS6 and  
 104 SC105iPS7<sup>19</sup> (nanopore). (All box plots show median, box edges represent 1st and 3rd quartiles,  
 105 whiskers extend to 1.5 x IQR; two sided wilcoxon rank sum tests, p-values: \* 0.05 - 0.01; \*\* 0.01 - 0.001;  
 106 \*\*\* < 0.001)

107 Additional dephosphorylation of all 5' ends before Cas12a-RNP-digestion chemically

108 protects DNA 'background' fragments from being ligated to sequencing adapters.

109 Consequently, only those fragments cut by Cas12a-RNPs are capable of being

110 sequenced by this procedure (Fig. 2a). Using this approach we were able to obtain a

111 total of 1137 reads covering the  $(G_4C_2)_n$ -repeat including 442 evaluable reads from

112 expanded alleles (Suppl. Table 2, Suppl. Discussion 3). Consistent with Southern

113 blot results from the same cell line (Suppl. Fig. 6 a-d), we found two distinct repeat

114 expansion distributions (Fig. 2b). To explore the general applicability of our  
115 enrichment, sequencing and read processing we next tested two isogenic, patient-  
116 derived cell lines (SC105iPS6, SC105iPS7) carrying a FMR1-repeat expansion with  
117 an additional set of FMR1-targeting Cas12a-RNPs (Suppl. Table 1) and found two  
118 different repeat expansion distributions (Fig. 2e).

119 Lastly, epigenetic modification of both C9orf72 and FMR1 loci have been correlated  
120 with STR expansion status and patient characteristics in both disorders<sup>7,8</sup>. We  
121 therefore combined single molecule CpG methylation analysis using nanopolish<sup>18</sup>  
122 with our nanoSTRique results and found that in the 24/5#2 line all reads with STR  
123 expansions > 750 repeats showed significantly increased methylation at the  
124 promoter CpG island while all wild type reads and those with < 500 repeats were not  
125 or only partially methylated (Two sided wilcoxon rank sum test  $p < 0,001$ , Fig. 2C-D,  
126 Suppl. Fig. 4, Suppl. Discussion 4). Similarly, we found all FMR1 wild type alleles  
127 enriched from controls were unmethylated at a CpG island overlapping the CGG-  
128 STR. Consistent with previous findings<sup>19</sup> and in our Southern blot analyses, all  
129 expanded alleles identified by nanoSTRique from both isogenic FXS-patient derived  
130 cell lines<sup>19</sup>, were determined to be methylated (Fig. 2f, Suppl. Fig. 6f-h).

131 Our results demonstrate the power of nanopore sequencing for the precise and  
132 multilayered molecular characterization of pathological short tandem repeat  
133 expansions. We have increased the enrichment for regions of interest on the  
134 background of the human genome approximately two to three orders of magnitude  
135 without any target amplification by using selective, multiplexed Cas12a-based  
136 chemical tagging of DNA fragments. Importantly, our method does not require any  
137 additional instruments in contrast to other previously reported enrichment

138 strategies<sup>20</sup> and enables reporting the DNA methylation status of the same alleles.  
139 The Cas12a-target enrichment and nanoSTRique can be rapidly adapted to any  
140 other genomic region of interest, ensuring broad applicability to overcome challenges  
141 associated with the single molecule analysis integrating genetic and epigenetic  
142 signals associated with unstable repeat expansions or any other as of yet  
143 'unsequenceable' genomic regions in human health and disease. This type of  
144 analysis improves diagnostic workflows in regard to accuracy and resolution of  
145 unstable repeat expansion while enabling efforts to gain mechanistic insights into  
146 effects on differentiation, aging and future therapeutic agents that modify DNA  
147 methylation.

## 148 7. Acknowledgements

149 We are deeply thankful for the invaluable support by c9FTD/ALS and FXS patients  
150 and their families who donated fibroblast for this study. The C9orf72 BAC was  
151 generously provided by Robert Baloh and Shaughn Bell (Cedars Sinai Medical  
152 Center, Los Angeles, CA, USA). We are grateful to Jeanne Loring and Ai Zhang  
153 (The Scripps Research Institute, La Jolla, CA, USA) for providing us with hiPSC lines  
154 from a Fragile X patient (Supported by NIH R33MH087925-03). We thank Philip van  
155 Damme and Wim Robberecht (Laboratory for Neurobiology; VIB-KU Leuven Center  
156 for Brain & Disease Research, Leuven, Belgium) for providing the c9FTD/ALS  
157 patient-derived fibroblasts used for reprogramming. We acknowledge the expert  
158 assistance of the technical staff of the molecular genetics laboratory of the Institute  
159 of Human Genetics, Ulm. PK and JL acknowledge financial support by the Hector  
160 Stiftung II gGmbH. This work was supported by the Max Planck Society.

## 161 8. Author information

### 162 Contributions:

163 PG, BMS and FJM conceived the project. BB and RT performed cell culture, plasmid  
164 and BAC expansion and extraction. PG wrote the nanoSTRique pipeline. PG, BMS,  
165 CR, HK conducted additional bioinformatic analyses. PK and JL reprogrammed the  
166 c9FTD/ALS hiPSC from patient fibroblasts used in this study. ER, RB, AH, JEG  
167 developed the Cas12a-RNP protocol. BB further developed the Cas12a protocol with  
168 c9FTD/ALS and FXS patient-derived DNA and performed all nanopore library  
169 preparation and nanopore sequencing for the results presented in this manuscript,  
170 RT and CG worked on optimization of aspects of the enrichment protocol. GA and  
171 RS conducted diagnostic testing of the repeat expansions by Southern Blot and PCR  
172 analyses, SS, RS, OA and GA provided clinical and diagnostic advice. PG, BMS, AM  
173 and FJM wrote the manuscript. FJM oversaw the study. All authors contributed to the  
174 editing and completion of the manuscript.

### 175 Competing Interests Declaration:

176 ER, RB, AH and JEG are employees of Oxford Nanopore Technologies Ltd (ONT).  
177 CR was reimbursed for travel costs for an invited talk at the Nanopore Days 2018 in  
178 Heidelberg (Germany) by ONT. ONT had no role in the study design, interpretation  
179 of results and writing of the manuscript.

## 180 9. Data availability

181 All sequencing data points generated in this study (i.e. nanopore reads, raw and  
182 base called) and utilized for the determination of FMR1 and C9orf72 repeat



183 expansion lengths and methylation status will be made public upon acceptance  
184 through a public repository (e.g. EGA). Whole genome sequencing data generated  
185 for this study will be made accessible to researchers upon request under a Data  
186 Access Agreement similar to the procedure required for managed access by the  
187 European Genome-phenome Archive. (for details see:  
188 [https://www.ebi.ac.uk/ega/submission/data\\_access\\_committee/policy\\_documentation](https://www.ebi.ac.uk/ega/submission/data_access_committee/policy_documentation)).

189

- 190 1. Gatchel, J. R. & Zoghbi, H. Y. Diseases of unstable repeat expansion: mechanisms and  
191 common principles. *Nat Rev Genet* **6**, 743–755 (2005).
- 192 2. Renton, A. E. *et al.* A hexanucleotide repeat expansion in C9ORF72 is the cause of  
193 chromosome 9p21-linked ALS-FTD. *Neuron* **72**, 257–268 (2011).
- 194 3. DeJesus-Hernandez, M. *et al.* Expanded GGGGCC hexanucleotide repeat in noncoding  
195 region of C9ORF72 causes chromosome 9p-linked FTD and ALS. *Neuron* **72**, 245–256 (2011).
- 196 4. Verkerk, A. J. *et al.* Identification of a gene (FMR-1) containing a CGG repeat coincident with a  
197 breakpoint cluster region exhibiting length variation in fragile X syndrome. *Cell* **65**, 905–914  
198 (1991).
- 199 5. van Blitterswijk, M. *et al.* Association between repeat sizes and clinical and pathological  
200 characteristics in carriers of C9ORF72 repeat expansions (Xpansize-72): a cross-sectional  
201 cohort study. *Lancet Neuro* **12**, 978–988 (2013).
- 202 6. Xi, Z. *et al.* Hypermethylation of the CpG Island Near the G4C2 Repeat in ALS with a C9orf72  
203 Expansion. *The American Journal of Human Genetics* **92**, 981–989 (2013).
- 204 7. Russ, J. *et al.* Hypermethylation of repeat expanded C9orf72 is a clinical and molecular  
205 disease modifier. *Acta Neuropathol.* **129**, 39–52 (2015).
- 206 8. Hornstra, L. K., Nelson, D. L., Warren, S. T. & Yang, T. P. High resolution methylation analysis  
207 of the FMR1 gene trinucleotide repeat region in fragile X syndrome. *Hum Mol Genet* **2**, 1659–  
208 1665 (1993).
- 209 9. Mizielińska, S. *et al.* C9orf72 repeat expansions cause neurodegeneration in Drosophila  
210 through arginine-rich proteins. *Science* **345**, 1192–1194 (2014).
- 211 10. Liu, Q., Zhang, P., Wang, D., Gu, W. & Wang, K. Interrogating the ‘unsequenceable’ genomic  
212 trinucleotide repeat disorders by long-read sequencing. *Genome Medicine* **2017 9:19**, 65  
213 (2017).
- 214 11. Dashnow, H. *et al.* STRetch: detecting and discovering pathogenic short tandem repeat  
215 expansions. *Genome Bio* **19**, 121 (2018).
- 216 12. Li, H. Minimap2: pairwise alignment for nucleotide sequences. *Bioinformatics* **3**, 321 (2018).
- 217 13. Reinert, K. *et al.* The SeqAn C++ template library for efficient sequence analysis: A resource  
218 for programmers. *J. Biotechnol.* **261**, 157–168 (2017).
- 219 14. Schreiber, J. & Karplus, K. Analysis of nanopore data using hidden Markov models.  
220 *Bioinformatics* **31**, 1897–1903 (2015).
- 221 15. O'Rourke, J. G. *et al.* C9orf72 BAC Transgenic Mice Display Typical Pathologic Features of  
222 ALS/FTD. *Neuron* **88**, 892–901 (2015).
- 223 16. Ebbert, M. T. W. *et al.* Long-read sequencing across the C9orf72 ‘GGGGCC’ repeat  
224 expansion: implications for clinical use and genetic discovery efforts in human disease. *Mol*  
225 *Neurodegeneration* **13**, 46 (2018).
- 226 17. Zetsche, B. *et al.* Cpf1 Is a Single RNA-Guided Endonuclease of a Class 2 CRISPR-Cas  
227 System. *Cell* **163**, 759–771 (2015).
- 228 18. Simpson, J. T. *et al.* Detecting DNA cytosine methylation using nanopore sequencing. *Nat*  
229 *Methods* (2017). doi:10.1038/nmeth.4184
- 230 19. Boland, M. J. *et al.* Molecular analyses of neurogenic defects in a human pluripotent stem cell  
231 model of fragile X syndrome. *Brain* **140**, 582–598 (2017).
- 232 20. Gabrieli, T. *et al.* Selective nanopore sequencing of human BRCA1 by Cas9-assisted targeting  
233 of chromosome segments (CATCH). *Nucl. Acids Res.* **46**, e87–e87 (2018).
